# Supplementary material for: Occurrence and distribution of microplastics in the surface water and sediment of two typical estuaries in Bohai Bay, China
Source: Royal Society of Chemistry journal article supplement (doi:10.1039/c9em00148d), 2019-01-01
Supplement: c9em00148d1.pdf [file c9em00148d1.pdf]

## Supplementary

**Fig. S1.** ATR-FTIR spectra of selected microplastic samples from two estuaries of Bohai Bay.

**Table S1.** A summary of microplastic concentrations according to the published studies in the world.

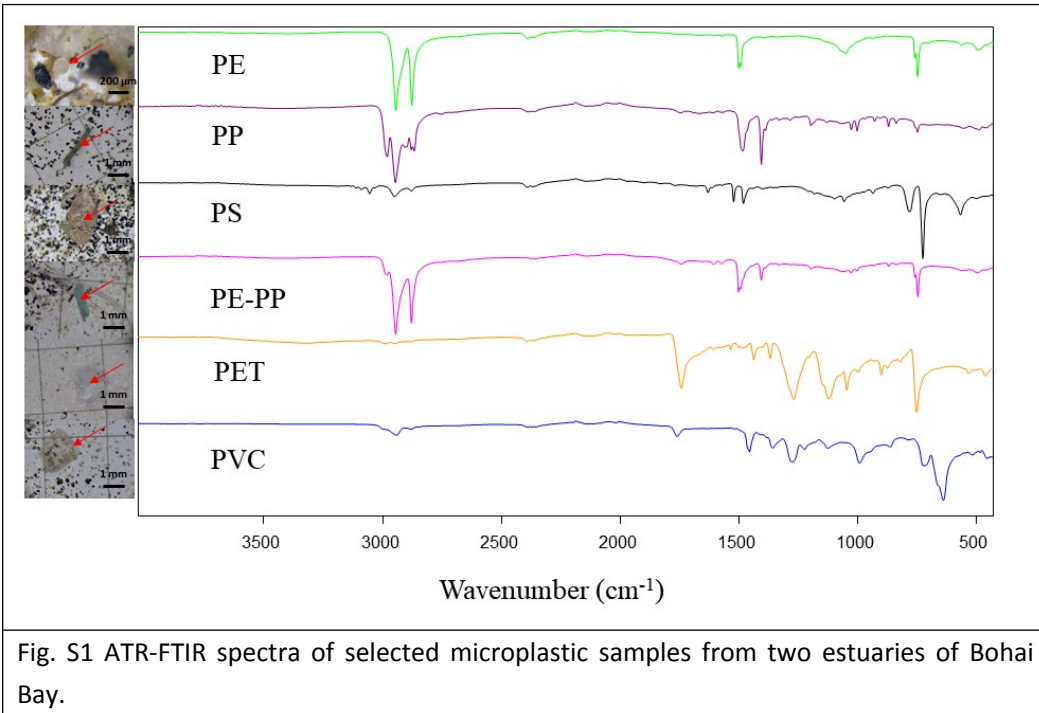

Fig. S1 ATR-FTIR spectra of selected microplastic samples from two estuaries of Bohai Bay.

Table S1 A summary of microplastic concentrations according to the published studies in the world.

| Location                      | Location specification     | Particle size (mm) | Concentrations(items/m <sup>3</sup> ; items/kg dw) | Reference |
|-------------------------------|----------------------------|--------------------|----------------------------------------------------|-----------|
| China coast                   | Urban estuary              | < 5                | 680.0-1245.8                                       | 29        |
| Bohai Sea, China              | Surface water              | 0.33-5             | 0.33 ± 0.34                                        | 36        |
| Bay of Brest, France          | Surface water              | < 5                | 0.24 ± 0.35                                        | 37        |
| Southwest of Svalbard, Norway | Arctic water (surface)     | < 5                | 0.34 ± 0.31                                        | 15        |
| Southwest of Svalbard, Norway | Arctic water (sub-surface) | < 5                | 2.68 ± 2.95                                        | 15        |
| Khark Island coast, Iran      | Sediment                   | < 5                | 59 ± 20-217 ± 20                                   | 40        |
| Bohai coastal, China          | Beach                      | < 5                | 102.9-163.3 (127.9)                                | 41        |
| Persian Gulf                  | Littoral sediment          | < 5                | 61 ± 49                                            | 44        |
| Singapore coastal areas       | Mangrove sediment          | < 5                | 36.8 ± 23.6                                        | 45        |
| Lagoon of Venice, Italy       | Sediment                   | < 1                | 672-2175                                           | 42        |
| Scapa Flow, UK                | Intertidal sediment        | < 5                | 730-2300                                           | 43        |
| Baltic beaches, Russia        | Sandy beach                | 0.5-5              | 1.3-36.3                                           | 46        |
| Southern Portuguese shelf     | Sediment                   | < 5                | 1148                                               | 20        |
